# Supplementary material for: Antibiotic Prescription in the Community-Dwelling Elderly Population in Lombardy, Italy: A Sub-Analysis of the EDU.RE.DRUG Study
Source: MDPI journal article supplement (doi:10.3390/antibiotics11101369), 2022-10-07
Supplement: s1 [file s1]

## SUPPLEMENTARY MATERIAL

# Antibiotic Prescription in the Community-Dwelling Elderly Population in Lombardy, Italy: A Sub-Analysis of the EDU.RE.DRUG Study

**Table S1** – Characteristics of the resident citizens (≥65 years) and their general practitioners (GP) in Lombardy region and by local health unit (LHU)

|                     | <b>Lombardy*</b> | <b>Bergamo</b> | <b>Lecco</b> | <b>Mantova</b> | <b>Monza<br/>Brianza</b> | <b>4 LHUs<br/>combined</b> |
|---------------------|------------------|----------------|--------------|----------------|--------------------------|----------------------------|
| <b>CITIZENS (N)</b> |                  |                |              |                |                          |                            |
| ≥65 ys              | <b>2269109</b>   | <b>234053</b>  | <b>79512</b> | <b>97529</b>   | <b>195766</b>            | <b>606860</b>              |
| 65-74 ys            | 1095770          | 118883         | 39170        | 46446          | 95014                    | 299513                     |
| 75-84 ys            | 826847           | 82429          | 28366        | 34907          | 72031                    | 217733                     |
| ≥85 ys              | 346492           | 32741          | 11976        | 16176          | 28721                    | 89614                      |
| <b>MALES (N)</b>    |                  |                |              |                |                          |                            |
| ≥65 ys              | <b>977542</b>    | <b>103521</b>  | <b>35043</b> | <b>41819</b>   | <b>85640</b>             | <b>266023</b>              |
| 65-74 ys            | 516603           | 57620          | 18882        | 22020          | 44755                    | 143277                     |
| 75-84 ys            | 354322           | 35869          | 12435        | 14943          | 31566                    | 94813                      |
| ≥85 ys              | 106617           | 10032          | 3726         | 4856           | 9319                     | 27933                      |
| <b>FEMALES (N)</b>  |                  |                |              |                |                          |                            |
| ≥65 ys              | <b>1291567</b>   | <b>130532</b>  | <b>44469</b> | <b>55710</b>   | <b>110126</b>            | <b>340837</b>              |
| 65-74 ys            | 579167           | 61263          | 20288        | 24426          | 50259                    | 156236                     |
| 75-84 ys            | 472525           | 46560          | 15931        | 19964          | 40465                    | 122920                     |
| ≥85 ys              | 239875           | 22709          | 8250         | 11320          | 19402                    | 61681                      |
| <b>GP (N)</b>       |                  |                |              |                |                          |                            |
| <b>Overall</b>      | <b>6218</b>      | <b>644</b>     | <b>214</b>   | <b>266</b>     | <b>519</b>               | <b>1643</b>                |
| Males               | 3924             | 414            | 147          | 164            | 314                      | 1039                       |
| Females             | 2294             | 230            | 67           | 102            | 205                      | 604                        |

\*data retrieved from ISTAT (<https://demo.istat.it/popres/index.php?anno=2019&lingua=ita>) and Ministry of Health websites ([https://www.salute.gov.it/portale/documentazione/p6\\_2\\_2\\_1.jsp?lingua=italiano&id=2980](https://www.salute.gov.it/portale/documentazione/p6_2_2_1.jsp?lingua=italiano&id=2980))

**Table S2 - ESAC-based indicators**

|                |            |                                                                                                                                                                                                                                                                        |
|----------------|------------|------------------------------------------------------------------------------------------------------------------------------------------------------------------------------------------------------------------------------------------------------------------------|
| <b>ESAC 1</b>  | J01_DID    | Consumption of antibacterials for systemic use (J01) expressed in DID                                                                                                                                                                                                  |
| <b>ESAC 2</b>  | J01C_DID   | Consumption of penicillins (J01C) expressed in DID                                                                                                                                                                                                                     |
| <b>ESAC 3</b>  | J01D_DID   | Consumption of cephalosporins (J01D) expressed in DID                                                                                                                                                                                                                  |
| <b>ESAC 4</b>  | J01F_DID   | Consumption of macrolides, lincosamides and streptogramins (J01F) expressed in DID                                                                                                                                                                                     |
| <b>ESAC 5</b>  | J01M_DID   | Consumption of quinolones (J01M) expressed in DID                                                                                                                                                                                                                      |
| <b>ESAC 6</b>  | J01CE_%    | Consumption of beta-lactamase sensitive penicillins (J01CE) expressed as percentage of the total consumption of antibacterials for systemic use (J01)                                                                                                                  |
| <b>ESAC 7</b>  | J01CR_%    | Consumption of combination of penicillins, including beta-lactamase inhibitor (J01CR) expressed as percentage of the total consumption of antibacterials for systemic use (J01)                                                                                        |
| <b>ESAC 8</b>  | J01DD+DE_% | Consumption of third- and fourth-generation cephalosporins (J01(DD+DE)) expressed as percentage of the total consumption of antibacterials for systemic use (J01)                                                                                                      |
| <b>ESAC 9</b>  | J01MA_%    | Consumption of fluoroquinolones (J01MA) expressed as percentage of the total consumption of antibacterials for systemic use (J01)                                                                                                                                      |
| <b>ESAC 10</b> | J01_B/N    | Ratio of consumption of broad-spectrum penicillins, cephalosporins, macrolides (except erythromycin) and fluoroquinolones (J01(CR+DC+DD+(FA-FA01)+MA)) to the consumption of narrow-spectrum penicillins, cephalosporins and erythromycin (J01(CA+CE+CF+DB+FA01))      |
| <b>ESAC 11</b> | J01_SV     | Seasonal variation (SV) of the total antibiotic consumption (J01)<br>SV= [Winter (January, February, March, October, November, and December) consumption expressed in DID/ Summer (April, May, June, July, August and September) consumption expressed in DID)-1] x100 |
| <b>ESAC 12</b> | J01M_SV    | Seasonal variation of quinolone consumption (J01M)<br>SV= [Winter (January, February, March, October, November, and December) consumption expressed in DID/ Summer (April, May, June, July, August and September) consumption expressed in DID)-1] x100                |

**Table S3 - WHO-AWaRe classification, 2021**

| <b>Antibiotic</b>                  | <b>Class</b>                         | <b>ATC code</b> | <b>Category</b> |
|------------------------------------|--------------------------------------|-----------------|-----------------|
| <i>Amikacin</i>                    | Aminoglycosides                      | J01GB06         | Access          |
| <i>Amoxicillin</i>                 | Penicillins                          | J01CA04         | Access          |
| <i>Amoxicillin/clavulanic-acid</i> | Beta-lactam/beta-lactamase-inhibitor | J01CR02         | Access          |
| <i>Ampicillin</i>                  | Penicillins                          | J01CA01         | Access          |
| <i>Ampicillin/sulbactam</i>        | Beta-lactam/beta-lactamase-inhibitor | J01CR01         | Access          |
| <i>Arbekacin</i>                   | Aminoglycosides                      | J01GB12         | Watch           |
| <i>Aspoxicillin</i>                | Penicillins                          | J01CA19         | Watch           |
| <i>Azidocillin</i>                 | Penicillins                          | J01CE04         | Access          |
| <i>Azithromycin</i>                | Macrolides                           | J01FA10         | Watch           |
| <i>Azlocillin</i>                  | Penicillins                          | J01CA09         | Watch           |
| <i>Aztreonam</i>                   | Monobactams                          | J01DF01         | Reserve         |
| <i>Bacampicillin</i>               | Penicillins                          | J01CA06         | Access          |
| <i>Bekanamycin</i>                 | Aminoglycosides                      | J01GB13         | Watch           |
| <i>Benzathine-benzylpenicillin</i> | Penicillins                          | J01CE08         | Access          |
| <i>Benzylpenicillin</i>            | Penicillins                          | J01CE01         | Access          |
| <i>Biapenem</i>                    | Carbapenems                          | J01DH05         | Watch           |
| <i>Brodinoprim</i>                 | Trimethoprim-derivatives             | J01EA02         | Access          |
| <i>Carbenicillin</i>               | Penicillins                          | J01CA03         | Watch           |
| <i>Carindacillin</i>               | Penicillins                          | J01CA05         | Watch           |
| <i>Carumonam</i>                   | Monobactams                          | J01DF02         | Reserve         |
| <i>Cefacetrile</i>                 | First-generation-cephalosporins      | J01DB10         | Access          |
| <i>Cefaclor</i>                    | Second-generation-cephalosporins     | J01DC04         | Watch           |
| <i>Cefadroxil</i>                  | First-generation-cephalosporins      | J01DB05         | Access          |
| <i>Cefalexin</i>                   | First-generation-cephalosporins      | J01DB01         | Access          |
| <i>Cefaloridine</i>                | First-generation-cephalosporins      | J01DB02         | Access          |
| <i>Cefalotin</i>                   | First-generation-cephalosporins      | J01DB03         | Access          |
| <i>Cefamandole</i>                 | Second-generation-cephalosporins     | J01DC03         | Watch           |
| <i>Cefapirin</i>                   | First-generation-cephalosporins      | J01DB08         | Access          |
| <i>Cefatrizine</i>                 | First-generation-cephalosporins      | J01DB07         | Access          |
| <i>Cefazedone</i>                  | First-generation-cephalosporins      | J01DB06         | Access          |
| <i>Cefazolin</i>                   | First-generation-cephalosporins      | J01DB04         | Access          |
| <i>Cefbuperazone</i>               | Second-generation-cephalosporins     | J01DC13         | Watch           |
| <i>Cefcapene-pivoxil</i>           | Third-generation-cephalosporins      | J01DD17         | Watch           |
| <i>Cefdinir</i>                    | Third-generation-cephalosporins      | J01DD15         | Watch           |
| <i>Cefditoren-pivoxil</i>          | Third-generation-cephalosporins      | J01DD16         | Watch           |
| <i>Cefepime</i>                    | Fourth-generation-cephalosporins     | J01DE01         | Watch           |
| <i>Cefetamet-pivoxil</i>           | Third-generation-cephalosporins      | J01DD10         | Watch           |
| <i>Cefiderocol</i>                 | Other-cephalosporins                 | J01DI04         | Reserve         |
| <i>Cefixime</i>                    | Third-generation-cephalosporins      | J01DD08         | Watch           |
| <i>Cefmenoxime</i>                 | Third-generation-cephalosporins      | J01DD05         | Watch           |
| <i>Cefmetazole</i>                 | Second-generation-cephalosporins     | J01DC09         | Watch           |
| <i>Cefminox</i>                    | Second-generation-cephalosporins     | J01DC12         | Watch           |
| <i>Cefodizime</i>                  | Third-generation-cephalosporins      | J01DD09         | Watch           |
| <i>Cefonicid</i>                   | Second-generation-cephalosporins     | J01DC06         | Watch           |
| <i>Cefoperazone</i>                | Third-generation-cephalosporins      | J01DD12         | Watch           |
| <i>Ceforanide</i>                  | Second-generation-cephalosporins     | J01DC11         | Watch           |

|                                  |                                  |                |         |
|----------------------------------|----------------------------------|----------------|---------|
| <i>Cefoselis</i>                 | Fourth-generation-cephalosporins | to be assigned | Watch   |
| <i>Cefotaxime</i>                | Third-generation-cephalosporins  | J01DD01        | Watch   |
| <i>Cefotetan</i>                 | Second-generation-cephalosporins | J01DC05        | Watch   |
| <i>Cefotiam</i>                  | Second-generation-cephalosporins | J01DC07        | Watch   |
| <i>Cefoxitin</i>                 | Second-generation-cephalosporins | J01DC01        | Watch   |
| <i>Cefozopran</i>                | Fourth-generation-cephalosporins | J01DE03        | Watch   |
| <i>Cefpiramide</i>               | Third-generation-cephalosporins  | J01DD11        | Watch   |
| <i>Cefpirome</i>                 | Fourth-generation-cephalosporins | J01DE02        | Watch   |
| <i>Cefpodoxime-proxetil</i>      | Third-generation-cephalosporins  | J01DD13        | Watch   |
| <i>Cefprozil</i>                 | Second-generation-cephalosporins | J01DC10        | Watch   |
| <i>Cefradine</i>                 | First-generation-cephalosporins  | J01DB09        | Access  |
| <i>Cefroxadine</i>               | First-generation-cephalosporins  | J01DB11        | Access  |
| <i>Cefsulodin</i>                | Third-generation-cephalosporins  | J01DD03        | Watch   |
| <i>Ceftaroline-fosamil</i>       | Fifth-generation cephalosporins  | J01DI02        | Reserve |
| <i>Ceftazidime</i>               | Third-generation-cephalosporins  | J01DD02        | Watch   |
| <i>Ceftazidime/avibactam</i>     | Third-generation-cephalosporins  | J01DD52        | Reserve |
| <i>Cefteram-pivoxil</i>          | Third-generation-cephalosporins  | J01DD18        | Watch   |
| <i>Ceftezole</i>                 | First-generation-cephalosporins  | J01DB12        | Access  |
| <i>Ceftibuten</i>                | Third-generation-cephalosporins  | J01DD14        | Watch   |
| <i>Ceftizoxime</i>               | Third-generation-cephalosporins  | J01DD07        | Watch   |
| <i>Ceftobiprole-medocaril</i>    | Fifth-generation cephalosporins  | J01DI01        | Reserve |
| <i>Ceftolozane/tazobactam</i>    | Fifth-generation cephalosporins  | J01DI54        | Reserve |
| <i>Ceftriaxone</i>               | Third-generation-cephalosporins  | J01DD04        | Watch   |
| <i>Cefuroxime</i>                | Second-generation-cephalosporins | J01DC02        | Watch   |
| <i>Chloramphenicol</i>           | Amphenicols                      | J01BA01        | Access  |
| <i>Chlortetracycline</i>         | Tetracyclines                    | J01AA03        | Watch   |
| <i>Cinoxacin</i>                 | Quinolones                       | J01MB06        | Watch   |
| <i>Ciprofloxacin</i>             | Fluoroquinolones                 | J01MA02        | Watch   |
| <i>Clarithromycin</i>            | Macrolides                       | J01FA09        | Watch   |
| <i>Clindamycin</i>               | Lincosamides                     | J01FF01        | Access  |
| <i>Clofoctol</i>                 | Phenol derivatives               | J01XX03        | Watch   |
| <i>Clometocillin</i>             | Penicillins                      | J01CE07        | Access  |
| <i>Clomocycline</i>              | Tetracyclines                    | J01AA11        | Watch   |
| <i>Cloxacillin</i>               | Penicillins                      | J01CF02        | Access  |
| <i>Colistin_IV</i>               | Polymyxins                       | J01XB01        | Reserve |
| <i>Colistin_oral</i>             | Polymyxins                       | A07AA10        | Reserve |
| <i>Dalbavancin</i>               | Glycopeptides                    | J01XA04        | Reserve |
| <i>Dalfopristin/quinupristin</i> | Streptogramins                   | J01FG02        | Reserve |
| <i>Daptomycin</i>                | Lipopeptides                     | J01XX09        | Reserve |
| <i>Delafoxacin</i>               | Fluoroquinolones                 | J01MA23        | Watch   |
| <i>Demeclocycline</i>            | Tetracyclines                    | J01AA01        | Watch   |
| <i>Dibekacin</i>                 | Aminoglycosides                  | J01GB09        | Watch   |
| <i>Dicloxacillin</i>             | Penicillins                      | J01CF01        | Access  |
| <i>Dirithromycin</i>             | Macrolides                       | J01FA13        | Watch   |
| <i>Doripenem</i>                 | Carbapenems                      | J01DH04        | Watch   |
| <i>Doxycycline</i>               | Tetracyclines                    | J01AA02        | Access  |
| <i>Enoxacin</i>                  | Fluoroquinolones                 | J01MA04        | Watch   |
| <i>Epicillin</i>                 | Penicillins                      | J01CA07        | Access  |

|                                       |                                  |                   |         |
|---------------------------------------|----------------------------------|-------------------|---------|
| <i>Eravacycline</i>                   | Tetracyclines                    | J01AA13           | Reserve |
| <i>Ertapenem</i>                      | Carbapenems                      | J01DH03           | Watch   |
| <i>Erythromycin</i>                   | Macrolides                       | J01FA01           | Watch   |
| <i>Faropenem</i>                      | Penems                           | J01DI03           | Reserve |
| <i>Fidaxomicin</i>                    | Macrolides                       | A07AA12           | Watch   |
| <i>Fleroxacin</i>                     | Fluoroquinolones                 | J01MA08           | Watch   |
| <i>Flomoxef</i>                       | Second-generation-cephalosporins | J01DC14           | Watch   |
| <i>Flucloxacillin</i>                 | Penicillins                      | J01CF05           | Access  |
| <i>Flumequine</i>                     | Quinolones                       | J01MB07           | Watch   |
| <i>Flurithromycin</i>                 | Macrolides                       | J01FA14           | Watch   |
| <i>Fosfomycin_IV</i>                  | Phosphonics                      | J01XX01           | Reserve |
| <i>Fosfomycin_oral</i>                | Phosphonics                      | J01XX01           | Watch   |
| <i>Furazidin</i>                      | Nitrofurán derivatives           | J01XE03           | Access  |
| <i>Fusidic-acid</i>                   | Steroid antibacterials           | J01XC01           | Watch   |
| <i>Garenoxacin</i>                    | Fluoroquinolones                 | J01MA19           | Watch   |
| <i>Gatifloxacin</i>                   | Fluoroquinolones                 | J01MA16           | Watch   |
| <i>Gemifloxacin</i>                   | Fluoroquinolones                 | J01MA15           | Watch   |
| <i>Gentamicin</i>                     | Aminoglycosides                  | J01GB03           | Access  |
| <i>Grepafloxacin</i>                  | Fluoroquinolones                 | J01MA11           | Watch   |
| <i>Hetacillin</i>                     | Penicillins                      | J01CA18           | Access  |
| <i>Iclaprim</i>                       | Trimethoprim-derivatives         | J01EA03           | Reserve |
| <i>Imipenem/cilastatin</i>            | Carbapenems                      | J01DH51           | Watch   |
| <i>Imipenem/cilastatin/relebactam</i> | Carbapenems                      | J01DH56           | Reserve |
| <i>Isepamicin</i>                     | Aminoglycosides                  | J01GB11           | Watch   |
| <i>Josamycin</i>                      | Macrolides                       | J01FA07           | Watch   |
| <i>Kanamycin_IV</i>                   | Aminoglycosides                  | J01GB04           | Watch   |
| <i>Kanamycin_oral</i>                 | Aminoglycosides                  | A07AA08           | Watch   |
| <i>Lascufloxacin</i>                  | Fluoroquinolones                 | J01MA25           | Watch   |
| <i>Latamoxef</i>                      | Third-generation-cephalosporins  | J01DD06           | Watch   |
| <i>Lefamulin</i>                      | Pleuromutilin                    | J01XX12           | Reserve |
| <i>Levofloxacin</i>                   | Fluoroquinolones                 | J01MA12           | Watch   |
| <i>Levonadifloxacin</i>               | Fluoroquinolones                 | J01MA24           | Watch   |
| <i>Lincomycin</i>                     | Lincosamides                     | J01FF02           | Watch   |
| <i>Linezolid</i>                      | Oxazolidinones                   | J01XX08           | Reserve |
| <i>Lomefloxacin</i>                   | Fluoroquinolones                 | J01MA07           | Watch   |
| <i>Loracarbef</i>                     | Second-generation-cephalosporins | J01DC08           | Watch   |
| <i>Lymecycline</i>                    | Tetracyclines                    | J01AA04           | Watch   |
| <i>Mecillinam</i>                     | Penicillins                      | J01CA11           | Access  |
| <i>Meropenem</i>                      | Carbapenems                      | J01DH02           | Watch   |
| <i>Meropenem/vaborbactam</i>          | Carbapenems                      | J01DH52           | Reserve |
| <i>Metacycline</i>                    | Tetracyclines                    | J01AA05           | Watch   |
| <i>Metampicillin</i>                  | Penicillins                      | J01CA14           | Access  |
| <i>Meticillin</i>                     | Penicillins                      | J01CF03           | Access  |
| <i>Metronidazole_IV</i>               | Imidazoles                       | J01XD01           | Access  |
| <i>Metronidazole_oral</i>             | Imidazoles                       | P01AB01           | Access  |
| <i>Mezlocillin</i>                    | Penicillins                      | J01CA10           | Watch   |
| <i>Micronomicin</i>                   | Aminoglycosides                  | to be<br>assigned | Watch   |
| <i>Midecamycin</i>                    | Macrolides                       | J01FA03           | Watch   |

|                                  |                                                       |         |         |
|----------------------------------|-------------------------------------------------------|---------|---------|
| <i>Minocycline_IV</i>            | Tetracyclines                                         | J01AA08 | Reserve |
| <i>Minocycline_oral</i>          | Tetracyclines                                         | J01AA08 | Watch   |
| <i>Miocamycin</i>                | Macrolides                                            | J01FA11 | Watch   |
| <i>Moxifloxacin</i>              | Fluoroquinolones                                      | J01MA14 | Watch   |
| <i>Nafcillin</i>                 | Penicillins                                           | J01CF06 | Access  |
| <i>Nemonoxacin</i>               | Quinolones                                            | J01MB08 | Watch   |
| <i>Neomycin_IV</i>               | Aminoglycosides                                       | J01GB05 | Watch   |
| <i>Neomycin_oral</i>             | Aminoglycosides                                       | A07AA01 | Watch   |
| <i>Netilmicin</i>                | Aminoglycosides                                       | J01GB07 | Watch   |
| <i>Nifurtinol</i>                | Nitrofurans derivatives                               | J01XE02 | Access  |
| <i>Nitrofurantoin</i>            | Nitrofurans-derivatives                               | J01XE01 | Access  |
| <i>Norfloxacin</i>               | Fluoroquinolones                                      | J01MA06 | Watch   |
| <i>Ofloxacin</i>                 | Fluoroquinolones                                      | J01MA01 | Watch   |
| <i>Oleandomycin</i>              | Macrolides                                            | J01FA05 | Watch   |
| <i>Omadacycline</i>              | Tetracyclines                                         | J01AA15 | Reserve |
| <i>Oritavancin</i>               | Glycopeptides                                         | J01XA05 | Reserve |
| <i>Ornidazole_IV</i>             | Imidazoles                                            | J01XD03 | Access  |
| <i>Ornidazole_oral</i>           | Imidazoles                                            | P01AB03 | Access  |
| <i>Oxacillin</i>                 | Penicillins                                           | J01CF04 | Access  |
| <i>Oxolinic-acid</i>             | Quinolones                                            | J01MB05 | Watch   |
| <i>Oxytetracycline</i>           | Tetracyclines                                         | J01AA06 | Watch   |
| <i>Panipenem</i>                 | Carbapenems                                           | J01DH55 | Watch   |
| <i>Pazufloxacin</i>              | Fluoroquinolones                                      | J01MA18 | Watch   |
| <i>Pefloxacin</i>                | Fluoroquinolones                                      | J01MA03 | Watch   |
| <i>Penamecillin</i>              | Penicillins                                           | J01CE06 | Access  |
| <i>Penimepicycline</i>           | Tetracyclines                                         | J01AA10 | Watch   |
| <i>Pheneticillin</i>             | Penicillins                                           | J01CE05 | Watch   |
| <i>Phenoxyethylpenicillin</i>    | Penicillins                                           | J01CE02 | Access  |
| <i>Pipemidic-acid</i>            | Quinolones                                            | J01MB04 | Watch   |
| <i>Piperacillin</i>              | Penicillins                                           | J01CA12 | Watch   |
| <i>Piperacillin/tazobactam</i>   | Beta-lactam/beta-lactamase-inhibitor_anti-pseudomonal | J01CR05 | Watch   |
| <i>Piromidic-acid</i>            | Quinolones                                            | J01MB03 | Watch   |
| <i>Pivampicillin</i>             | Penicillins                                           | J01CA02 | Access  |
| <i>Pivmecillinam</i>             | Penicillins                                           | J01CA08 | Access  |
| <i>Plazomicin</i>                | Aminoglycosides                                       | J01GB14 | Reserve |
| <i>Polymyxin-B_IV</i>            | Polymyxins                                            | J01XB02 | Reserve |
| <i>Polymyxin-B_oral</i>          | Polymyxins                                            | A07AA05 | Reserve |
| <i>Pristinamycin</i>             | Streptogramins                                        | J01FG01 | Watch   |
| <i>Procaine-benzylpenicillin</i> | Penicillins                                           | J01CE09 | Access  |
| <i>Propicillin</i>               | Penicillins                                           | J01CE03 | Access  |
| <i>Prulifloxacin</i>             | Fluoroquinolones                                      | J01MA17 | Watch   |
| <i>Ribostamycin</i>              | Aminoglycosides                                       | J01GB10 | Watch   |
| <i>Rifabutin</i>                 | Rifamycins                                            | J04AB04 | Watch   |
| <i>Rifampicin</i>                | Rifamycins                                            | J04AB02 | Watch   |
| <i>Rifamycin_IV</i>              | Rifamycins                                            | J04AB03 | Watch   |
| <i>Rifamycin_oral</i>            | Rifamycins                                            | A07AA13 | Watch   |
| <i>Rifaximin</i>                 | Rifamycins                                            | A07AA11 | Watch   |
| <i>Rokitamycin</i>               | Macrolides                                            | J01FA12 | Watch   |

|                                      |                                       |         |        |
|--------------------------------------|---------------------------------------|---------|--------|
| <i>Rolitettracycline</i>             | Tetracyclines                         | J01AA09 | Watch  |
| <i>Rosoxacin</i>                     | Quinolones                            | J01MB01 | Watch  |
| <i>Roxithromycin</i>                 | Macrolides                            | J01FA06 | Watch  |
| <i>Rufloxacin</i>                    | Fluoroquinolones                      | J01MA10 | Watch  |
| <i>Sarecycline</i>                   | Tetracyclines                         | J01AA14 | Watch  |
| <i>Secnidazole</i>                   | Imidazoles                            | P01AB07 | Access |
| <i>Sisomicin</i>                     | Aminoglycosides                       | J01GB08 | Watch  |
| <i>Sitafloxacin</i>                  | Fluoroquinolones                      | J01MA21 | Watch  |
| <i>Solithromycin</i>                 | Macrolides                            | J01FA16 | Watch  |
| <i>Sparfloxacin</i>                  | Fluoroquinolones                      | J01MA09 | Watch  |
| <i>Spectinomycin</i>                 | Aminocyclitols                        | J01XX04 | Access |
| <i>Spiramycin</i>                    | Macrolides                            | J01FA02 | Watch  |
| <i>Spiramycin/metronidazole</i>      | Antibacterials_combinations           | J01RA04 | Watch  |
| <i>Streptoduocin</i>                 | Aminoglycosides                       | J01GA02 | Watch  |
| <i>Streptomycin_IV</i>               | Aminoglycosides                       | J01GA01 | Watch  |
| <i>Streptomycin_oral</i>             | Aminoglycosides                       | A07AA04 | Watch  |
| <i>Sulbactam</i>                     | Beta-lactamase-inhibitors             | J01CG01 | Access |
| <i>Sulbenicillin</i>                 | Penicillins                           | J01CA16 | Watch  |
| <i>Sulfadiazine</i>                  | Sulfonamides                          | J01EC02 | Access |
| <i>Sulfadiazine/tetroxoprim</i>      | Sulfonamide-trimethoprim-combinations | J01EE06 | Access |
| <i>Sulfadiazine/trimethoprim</i>     | Sulfonamide-trimethoprim-combinations | J01EE02 | Access |
| <i>Sulfadimethoxine</i>              | Sulfonamides                          | J01ED01 | Access |
| <i>Sulfadimidine</i>                 | Sulfonamides                          | J01EB03 | Access |
| <i>Sulfadimidine/trimethoprim</i>    | Sulfonamide-trimethoprim-combinations | J01EE05 | Access |
| <i>Sulfafurazole</i>                 | Sulfonamides                          | J01EB05 | Access |
| <i>Sulfaisodimidine</i>              | Sulfonamides                          | J01EB01 | Access |
| <i>Sulfalene</i>                     | Sulfonamides                          | J01ED02 | Access |
| <i>Sulfamazone</i>                   | Sulfonamides                          | J01ED09 | Access |
| <i>Sulfamerazine</i>                 | Sulfonamides                          | J01ED07 | Access |
| <i>Sulfamerazine/trimethoprim</i>    | Sulfonamide-trimethoprim-combinations | J01EE07 | Access |
| <i>Sulfamethizole</i>                | Sulfonamides                          | J01EB02 | Access |
| <i>Sulfamethoxazole</i>              | Sulfonamides                          | J01EC01 | Access |
| <i>Sulfamethoxazole/trimethoprim</i> | Sulfonamide-trimethoprim-combinations | J01EE01 | Access |
| <i>Sulfamethoxyypyridazine</i>       | Sulfonamides                          | J01ED05 | Access |
| <i>Sulfametomidine</i>               | Sulfonamides                          | J01ED03 | Access |
| <i>Sulfametoxydiazine</i>            | Sulfonamides                          | J01ED04 | Access |
| <i>Sulfametrole/trimethoprim</i>     | Sulfonamide-trimethoprim-combinations | J01EE03 | Access |
| <i>Sulfamoxole</i>                   | Sulfonamides                          | J01EC03 | Access |
| <i>Sulfamoxole/trimethoprim</i>      | Sulfonamide-trimethoprim-combinations | J01EE04 | Access |
| <i>Sulfanilamide</i>                 | Sulfonamides                          | J01EB06 | Access |
| <i>Sulfaperin</i>                    | Sulfonamides                          | J01ED06 | Access |
| <i>Sulfaphenazole</i>                | Sulfonamides                          | J01ED08 | Access |
| <i>Sulfapyridine</i>                 | Sulfonamides                          | J01EB04 | Access |
| <i>Sulfathiazole</i>                 | Sulfonamides                          | J01EB07 | Access |
| <i>Sulfathiourea</i>                 | Sulfonamides                          | J01EB08 | Access |
| <i>Sultamicillin</i>                 | Beta-lactam/beta-lactamase-inhibitor  | J01CR04 | Access |
| <i>Talampicillin</i>                 | Penicillins                           | J01CA15 | Access |
| <i>Tazobactam</i>                    | Beta-lactamase-inhibitors             | J01CG02 | Watch  |
| <i>Tebipenem</i>                     | Carbapenems                           | J01DH06 | Watch  |

|                        |                          |         |         |
|------------------------|--------------------------|---------|---------|
| <i>Tedizolid</i>       | Oxazolidinones           | J01XX11 | Reserve |
| <i>Teicoplanin</i>     | Glycopeptides            | J01XA02 | Watch   |
| <i>Telavancin</i>      | Glycopeptides            | J01XA03 | Reserve |
| <i>Telithromycin</i>   | Macrolides               | J01FA15 | Watch   |
| <i>Temafloxacin</i>    | Fluoroquinolones         | J01MA05 | Watch   |
| <i>Temocillin</i>      | Penicillins              | J01CA17 | Watch   |
| <i>Tetracycline</i>    | Tetracyclines            | J01AA07 | Access  |
| <i>Thiamphenicol</i>   | Amphenicols              | J01BA02 | Access  |
| <i>Ticarcillin</i>     | Penicillins              | J01CA13 | Watch   |
| <i>Tigecycline</i>     | Glycylcyclines           | J01AA12 | Reserve |
| <i>Tinidazole_IV</i>   | Imidazoles               | J01XD02 | Access  |
| <i>Tinidazole_oral</i> | Imidazoles               | P01AB02 | Access  |
| <i>Tobramycin</i>      | Aminoglycosides          | J01GB01 | Watch   |
| <i>Tosufloxacin</i>    | Fluoroquinolones         | J01MA22 | Watch   |
| <i>Trimethoprim</i>    | Trimethoprim-derivatives | J01EA01 | Access  |
| <i>Troleandomycin</i>  | Macrolides               | J01FA08 | Watch   |
| <i>Trovafloxacin</i>   | Fluoroquinolones         | J01MA13 | Watch   |
| <i>Vancomycin_IV</i>   | Glycopeptides            | J01XA01 | Watch   |
| <i>Vancomycin_oral</i> | Glycopeptides            | A07AA09 | Watch   |



**Table S4** - Antibiotic consumption per patient, stratified by sex and age groups

|                                    | Overall | Males | Females |
|------------------------------------|---------|-------|---------|
| <b>J01 DDD/patient</b>             |         |       |         |
| 65-74 <i>ys</i>                    | 15.95   | 16.87 | 15.20   |
| 75-84 <i>ys</i>                    | 16.02   | 17.42 | 14.95   |
| ≥85 <i>ys</i>                      | 16.68   | 18.05 | 15.99   |
| <b>J01 PACKAGES/patient</b>        |         |       |         |
| 65-74 <i>ys</i>                    | 3.15    | 3.28  | 3.05    |
| 75-84 <i>ys</i>                    | 3.53    | 3.76  | 3.36    |
| ≥85 <i>ys</i>                      | 4.43    | 4.60  | 4.35    |
| <b>J01 POSOLOGIC UNITS/patient</b> |         |       |         |
| 65-74 <i>ys</i>                    | 21.62   | 22.82 | 20.63   |
| 75-84 <i>ys</i>                    | 21.80   | 23.55 | 20.47   |
| ≥85 <i>ys</i>                      | 22.80   | 24.37 | 22.01   |

**Table S5 - DID consumption for each antibiotic class (ATC 3<sup>rd</sup> level) classified according to the WHO-AWaRe list (Access and Watch) and stratified by sex and age groups**

| Antibiotic classes (ATC 3 <sup>rd</sup> level)                                     | Males  |        | Females |        |
|------------------------------------------------------------------------------------|--------|--------|---------|--------|
|                                                                                    | Access | Watch  | Access  | Watch  |
| <b>65-74 years</b>                                                                 |        |        |         |        |
| <i>Aminoglycosides</i>                                                             | 0.0088 | 0.0032 | 0.0050  | 0.0012 |
| <i>Combinations of sulfonamides and trimethoprim</i>                               | 0.3501 |        | 0.2210  |        |
| <i>First-generation cephalosporins</i>                                             | 0.1373 |        | 0.0612  |        |
| <i>Fluoroquinolones</i>                                                            |        | 4.3122 |         | 3.4842 |
| <i>Fourth-generation cephalosporins</i>                                            |        | 0.0031 |         | 0.0029 |
| <i>Glycopeptides</i>                                                               |        | 0.0066 |         | 0.0018 |
| <i>Imidazoles</i>                                                                  |        |        | 0.00002 |        |
| <i>Lincosamides</i>                                                                | 0.1373 |        | 0.0052  |        |
| <i>Macrolides</i>                                                                  |        | 2.6369 |         | 3.5810 |
| <i>Penicillins</i>                                                                 | 1.0570 | 0.0005 | 1.2819  | 0.0001 |
| <i>Penicillins, combinations with beta lactamase inhibitors</i>                    | 5.0255 |        | 5.0346  |        |
| <i>Penicillins, combinations with beta lactamase inhibitors (anti-pseudomonal)</i> |        | 0.0114 |         | 0.0011 |
| <i>Phosphonics</i>                                                                 |        | 1.0472 |         | 0.6021 |
| <i>Second-generation cephalosporins</i>                                            |        | 0.0808 |         | 0.0936 |
| <i>Tetracyclines</i>                                                               | 0.2329 | 0.0182 | 0.1582  | 0.0331 |
| <i>Third-generation cephalosporins</i>                                             |        | 2.6485 |         | 1.5179 |
| <b>75-84 years</b>                                                                 |        |        |         |        |
| <i>Aminoglycosides</i>                                                             | 0.0105 | 0.0017 | 0.0095  | 0.0023 |
| <i>Combinations of sulfonamides and trimethoprim</i>                               | 0.3927 |        | 0.2481  |        |
| <i>First-generation cephalosporins</i>                                             | 0.1249 |        | 0.1017  |        |
| <i>Fluoroquinolones</i>                                                            |        | 5.4886 |         | 3.9376 |
| <i>Fourth-generation cephalosporins</i>                                            |        | 0.0066 |         | 0.0046 |
| <i>Glycopeptides</i>                                                               |        | 0.0027 |         | 0.0024 |
| <i>Imidazoles</i>                                                                  | 0.0001 |        | 0.0002  |        |
| <i>Lincosamides</i>                                                                | 0.0033 |        | 0.0022  |        |
| <i>Macrolides</i>                                                                  |        | 2.8671 |         | 2.9402 |
| <i>Penicillins</i>                                                                 | 0.9971 | 0.0003 | 1.0675  | 0.0004 |
| <i>Penicillins, combinations with beta lactamase inhibitors</i>                    | 5.5040 |        | 4.6896  |        |
| <i>Penicillins, combinations with beta lactamase inhibitors (anti-pseudomonal)</i> |        | 0.0035 |         | 0.0024 |
| <i>Phosphonics</i>                                                                 |        | 0.3395 |         | 0.9089 |
| <i>Second-generation cephalosporins</i>                                            |        | 0.0989 |         | 0.0850 |
| <i>Tetracyclines</i>                                                               | 0.2433 | 0.0737 | 0.1253  | 0.0267 |
| <i>Third-generation cephalosporins</i>                                             |        | 1.9597 |         | 1.7604 |
| <b>≥85 years</b>                                                                   |        |        |         |        |
| <i>Aminoglycosides</i>                                                             | 0.0332 | 0.0045 | 0.0149  | 0.0026 |

|                                                                                    |        |         |        |        |
|------------------------------------------------------------------------------------|--------|---------|--------|--------|
| <i>Combinations of sulfonamides and trimethoprim</i>                               | 0.3271 |         | 0.2551 |        |
| <i>First-generation cephalosporins</i>                                             | 0.1294 |         | 0.1159 |        |
| <i>Fluoroquinolones</i>                                                            |        | 6.6340  |        | 4.1972 |
| <i>Fourth-generation cephalosporins</i>                                            |        | 0.0097  |        | 0.0072 |
| <i>Glycopeptides</i>                                                               |        | 0.0109  |        | 0.0036 |
| <i>Imidazoles</i>                                                                  |        |         | 0.0003 |        |
| <i>Lincosamides</i>                                                                | 0.0043 |         | 0.0028 |        |
| <i>Macrolides</i>                                                                  |        | 2.9891  |        | 2.4774 |
| <i>Penicillins</i>                                                                 | 0.8290 | 0.00001 | 0.7853 | 0.0007 |
| <i>Penicillins, combinations with beta lactamase inhibitors</i>                    | 6.0317 |         | 4.8716 |        |
| <i>Penicillins, combinations with beta lactamase inhibitors (anti-pseudomonal)</i> |        | 0.0097  |        | 0.0122 |
| <i>Phosphonics</i>                                                                 |        | 0.7859  |        | 1.1655 |
| <i>Second-generation cephalosporins</i>                                            |        | 0.0763  |        | 0.0828 |
| <i>Tetracyclines</i>                                                               | 0.2942 | 0.0261  | 0.2061 | 0.0146 |
| <i>Third-generation cephalosporins</i>                                             |        | 2.9420  |        | 2.5156 |

**Table S6** – Rank of antibiotic substances (ATC 5<sup>th</sup> level) based on consumption in DID, classified according to the WHO-AWaRe list (Access and Watch) and stratified by sex (**panel a**: Overall; **panel b**: Males; **panel c**: Females)

**(a) Overall**

| Rank | Antibiotic name                     | ATC<br>5 <sup>th</sup> level | DDD        |        | DID   | AWaRe<br>Class |
|------|-------------------------------------|------------------------------|------------|--------|-------|----------------|
|      |                                     |                              | N          | %      |       |                |
| 1    | <i>amoxicillin+clavulanic acid</i>  | J01CR02                      | 1121952.69 | 30.54% | 5.07  | Access         |
| 2    | <i>levofloxacin</i>                 | J01MA12                      | 610010.00  | 16.60% | 2.75  | Watch          |
| 3    | <i>clarithromycin</i>               | J01FA09                      | 341759.00  | 9.30%  | 1.54  | Watch          |
| 4    | <i>azithromycin</i>                 | J01FA10                      | 314325.00  | 8.56%  | 1.42  | Watch          |
| 5    | <i>ciprofloxacin</i>                | J01MA02                      | 266686.50  | 7.26%  | 1.20  | Watch          |
| 6    | <i>amoxicillin</i>                  | J01CA04                      | 231910.26  | 6.31%  | 1.05  | Access         |
| 7    | <i>cefixime</i>                     | J01DD08                      | 227715.00  | 6.20%  | 1.03  | Watch          |
| 8    | <i>fosfomycin</i>                   | J01XX01                      | 129602.67  | 3.53%  | 0.59  | Watch          |
| 9    | <i>trimetoprim+sulfamethoxazole</i> | J01EE01                      | 64713.00   | 1.76%  | 0.29  | Access         |
| 10   | <i>ceftriaxone</i>                  | J01DD04                      | 64177.50   | 1.75%  | 0.29  | Watch          |
| 11   | <i>cefditoren</i>                   | J01DD16                      | 57460.00   | 1.56%  | 0.26  | Watch          |
| 12   | <i>doxycycline</i>                  | J01AA02                      | 42880.00   | 1.17%  | 0.19  | Access         |
| 13   | <i>prulifloxacin</i>                | J01MA17                      | 41158.00   | 1.12%  | 0.19  | Watch          |
| 14   | <i>ceftibuten</i>                   | J01DD14                      | 24991.20   | 0.68%  | 0.11  | Watch          |
| 15   | <i>cefalexina</i>                   | J01DB01                      | 23386.50   | 0.64%  | 0.11  | Access         |
| 16   | <i>norfloxacin</i>                  | J01MA06                      | 18067.00   | 0.49%  | 0.08  | Watch          |
| 17   | <i>cefuroxima</i>                   | J01DC02                      | 16254.00   | 0.44%  | 0.07  | Watch          |
| 18   | <i>cefpodoxime</i>                  | J01DD13                      | 14869.00   | 0.40%  | 0.07  | Watch          |
| 19   | <i>moxifloxacin</i>                 | J01MA14                      | 7810.00    | 0.21%  | 0.04  | Watch          |
| 20   | <i>spiramycin</i>                   | J01FA02                      | 7704.00    | 0.21%  | 0.03  | Watch          |
| 21   | <i>minocycline</i>                  | J01AA08                      | 7508.00    | 0.20%  | 0.03  | Watch          |
| 22   | <i>roxithromycin</i>                | J01FA06                      | 6198.00    | 0.17%  | 0.03  | Watch          |
| 23   | <i>lomefloxacin</i>                 | J01MA07                      | 5415.00    | 0.15%  | 0.02  | Watch          |
| 24   | <i>bacampicillin</i>                | J01CA06                      | 4332.00    | 0.12%  | 0.02  | Access         |
| 25   | <i>pipemidic acid</i>               | J01MB04                      | 3090.00    | 0.08%  | 0.01  | Watch          |
| 26   | <i>cefaclor</i>                     | J01DC04                      | 3014.50    | 0.08%  | 0.01  | Watch          |
| 27   | <i>lymecycline</i>                  | J01AA04                      | 2688.00    | 0.07%  | 0.01  | Watch          |
| 28   | <i>amikacin</i>                     | J01GB06                      | 2206.00    | 0.06%  | 0.01  | Access         |
| 29   | <i>ceftazidime</i>                  | J01DD02                      | 1849.38    | 0.05%  | 0.01  | Watch          |
| 30   | <i>miocamycin</i>                   | J01FA11                      | 1848.00    | 0.05%  | 0.01  | Watch          |
| 31   | <i>cefodizime</i>                   | J01DD09                      | 1196.50    | 0.03%  | 0.01  | Watch          |
| 32   | <i>cefepime</i>                     | J01DE01                      | 1027.50    | 0.03%  | <0.01 | Watch          |
| 33   | <i>teicoplanin</i>                  | J01XA02                      | 839.50     | 0.02%  | <0.01 | Watch          |
| 34   | <i>clindamycin</i>                  | J01FF01                      | 794.33     | 0.02%  | <0.01 | Access         |
| 35   | <i>piperacillin+tazobactam</i>      | J01CR05                      | 770.00     | 0.02%  | <0.01 | Watch          |
| 36   | <i>cefotaxime</i>                   | J01DD01                      | 708.00     | 0.02%  | <0.01 | Watch          |
| 37   | <i>flucloxacillin</i>               | J01CF05                      | 618.00     | 0.02%  | <0.01 | Access         |
| 38   | <i>pefloxacin</i>                   | J01MA03                      | 572.00     | 0.02%  | <0.01 | Watch          |

|    |                                    |         |        |        |       |        |
|----|------------------------------------|---------|--------|--------|-------|--------|
| 39 | <i>lincomycin</i>                  | J01FF02 | 555.33 | 0.02%  | <0.01 | Watch  |
| 40 | <i>cefprozil</i>                   | J01DC10 | 285.00 | 0.01%  | <0.01 | Watch  |
| 41 | <i>netilmicin</i>                  | J01GB07 | 259.29 | 0.01%  | <0.01 | Watch  |
| 42 | <i>tobramycin</i>                  | J01GB01 | 247.71 | 0.01%  | <0.01 | Watch  |
| 43 | <i>josamycin</i>                   | J01FA07 | 171.00 | <0.01% | <0.01 | Watch  |
| 44 | <i>rufloxacin</i>                  | J01MA10 | 132.00 | <0.01% | <0.01 | Watch  |
| 45 | <i>cefazolin</i>                   | J01DB04 | 98.00  | <0.01% | <0.01 | Access |
| 46 | <i>telithromycin</i>               | J01FA15 | 70.00  | <0.01% | <0.01 | Watch  |
| 47 | <i>piperacillin</i>                | J01CA12 | 53.00  | <0.01% | <0.01 | Watch  |
| 48 | <i>erythromycin</i>                | J01FA01 | 42.00  | <0.01% | <0.01 | Watch  |
| 49 | <i>benzathine benzylpenicillin</i> | J01CE08 | 36.25  | <0.01% | <0.01 | Access |
| 50 | <i>metronidazole</i>               | J01XD01 | 19.00  | <0.01% | <0.01 | Access |
| 51 | <i>ampicillin+sulbactam</i>        | J01CR01 | 17.17  | <0.01% | <0.01 | Access |
| 52 | <i>oxacillin</i>                   | J01CF04 | 16.50  | <0.01% | <0.01 | Access |
| 53 | <i>cefoxitin</i>                   | J01DC01 | 3.50   | <0.01% | <0.01 | Watch  |

**(b) Males**

| Rank | Antibiotic name                     | ATC<br>5 <sup>th</sup> level | DDD       |        | DID  | AWaRe<br>Class |
|------|-------------------------------------|------------------------------|-----------|--------|------|----------------|
|      |                                     |                              | N         | %      |      |                |
| 1    | <i>amoxicillin+clavulanic acid</i>  | J01CR02                      | 514776.70 | 30.90% | 5.3  | Access         |
| 2    | <i>levofloxacin</i>                 | J01MA12                      | 324385.00 | 19.47% | 3.34 | Watch          |
| 3    | <i>clarithromycin</i>               | J01FA09                      | 141265.00 | 8.48%  | 1.45 | Watch          |
| 4    | <i>azithromycin</i>                 | J01FA10                      | 133132.00 | 7.99%  | 1.37 | Watch          |
| 5    | <i>ciprofloxacin</i>                | J01MA02                      | 124146.50 | 7.45%  | 1.28 | Watch          |
| 6    | <i>amoxicillin</i>                  | J01CA04                      | 95972.65  | 5.76%  | 0.99 | Access         |
| 7    | <i>cefixime</i>                     | J01DD08                      | 95650.00  | 5.74%  | 0.99 | Watch          |
| 8    | <i>trimetoprim+sulfamethoxazole</i> | J01EE01                      | 35234.00  | 2.11%  | 0.36 | Access         |
| 9    | <i>ceftriaxone</i>                  | J01DD04                      | 28992.00  | 1.74%  | 0.3  | Watch          |
| 10   | <i>fosfomycin</i>                   | J01XX01                      | 28249.33  | 1.70%  | 0.29 | Watch          |
| 11   | <i>cefditoren</i>                   | J01DD16                      | 27080.00  | 1.63%  | 0.28 | Watch          |
| 12   | <i>doxycycline</i>                  | J01AA02                      | 23600.00  | 1.42%  | 0.24 | Access         |
| 13   | <i>prulifloxacin</i>                | J01MA17                      | 22478.00  | 1.35%  | 0.23 | Watch          |
| 14   | <i>cefalexina</i>                   | J01DB01                      | 12786.00  | 0.77%  | 0.13 | Access         |
| 15   | <i>ceftibuten</i>                   | J01DD14                      | 11597.40  | 0.70%  | 0.12 | Watch          |
| 16   | <i>cefuroxima</i>                   | J01DC02                      | 7326.00   | 0.44%  | 0.08 | Watch          |
| 17   | <i>cefpodoxime</i>                  | J01DD13                      | 5865.00   | 0.35%  | 0.06 | Watch          |
| 18   | <i>minocycline</i>                  | J01AA08                      | 5000.00   | 0.30%  | 0.05 | Watch          |
| 19   | <i>norfloxacin</i>                  | J01MA06                      | 4256.00   | 0.26%  | 0.04 | Watch          |
| 20   | <i>moxifloxacin</i>                 | J01MA14                      | 3925.00   | 0.24%  | 0.04 | Watch          |
| 21   | <i>spiramycin</i>                   | J01FA02                      | 3040.00   | 0.18%  | 0.03 | Watch          |
| 22   | <i>lomefloxacin</i>                 | J01MA07                      | 3005.00   | 0.18%  | 0.03 | Watch          |
| 23   | <i>roxithromycin</i>                | J01FA06                      | 2400.00   | 0.14%  | 0.02 | Watch          |
| 24   | <i>bacampicillin</i>                | J01CA06                      | 1968.00   | 0.12%  | 0.02 | Access         |
| 25   | <i>lymecycline</i>                  | J01AA04                      | 1778.00   | 0.11%  | 0.02 | Watch          |

|    |                                    |         |         |        |       |        |
|----|------------------------------------|---------|---------|--------|-------|--------|
| 26 | <i>amikacin</i>                    | J01GB06 | 1162.50 | 0.07%  | 0.01  | Access |
| 27 | <i>cefactor</i>                    | J01DC04 | 1132.50 | 0.07%  | 0.01  | Watch  |
| 28 | <i>ceftazidime</i>                 | J01DD02 | 851.25  | 0.05%  | 0.01  | Watch  |
| 29 | <i>pipemidic acid</i>              | J01MB04 | 610.00  | 0.04%  | 0.01  | Watch  |
| 30 | <i>miocamycin</i>                  | J01FA11 | 588.00  | 0.04%  | 0.01  | Watch  |
| 31 | <i>teicoplanin</i>                 | J01XA02 | 550.50  | 0.03%  | 0.01  | Watch  |
| 32 | <i>cefodizime</i>                  | J01DD09 | 549.00  | 0.03%  | 0.01  | Watch  |
| 33 | <i>cefepime</i>                    | J01DE01 | 492.75  | 0.03%  | 0.01  | Watch  |
| 34 | <i>clindamycin</i>                 | J01FF01 | 335.33  | 0.02%  | <0.01 | Access |
| 35 | <i>piperacillin+tazobactam</i>     | J01CR05 | 328.00  | 0.02%  | <0.01 | Watch  |
| 36 | <i>flucloxacillin</i>              | J01CF05 | 258.00  | 0.02%  | <0.01 | Access |
| 37 | <i>cefotaxime</i>                  | J01DD01 | 207.50  | 0.01%  | <0.01 | Watch  |
| 38 | <i>lincomycin</i>                  | J01FF02 | 206.00  | 0.01%  | <0.01 | Watch  |
| 39 | <i>netilmicin</i>                  | J01GB07 | 167.43  | 0.01%  | <0.01 | Watch  |
| 40 | <i>pefloxacin</i>                  | J01MA03 | 167.00  | 0.01%  | <0.01 | Watch  |
| 41 | <i>rufloxacin</i>                  | J01MA10 | 120.00  | 0.01%  | <0.01 | Watch  |
| 42 | <i>tobramycin</i>                  | J01GB01 | 107.71  | 0.01%  | <0.01 | Watch  |
| 43 | <i>cefprozil</i>                   | J01DC10 | 81.00   | <0.01% | <0.01 | Watch  |
| 44 | <i>josamycin</i>                   | J01FA07 | 72.00   | <0.01% | <0.01 | Watch  |
| 45 | <i>telithromycin</i>               | J01FA15 | 55.00   | <0.01% | <0.01 | Watch  |
| 46 | <i>cefazolin</i>                   | J01DB04 | 35.67   | <0.01% | <0.01 | Access |
| 47 | <i>benzathine benzylpenicillin</i> | J01CE08 | 22.75   | <0.01% | <0.01 | Access |
| 48 | <i>oxacillin</i>                   | J01CF04 | 16.50   | <0.01% | <0.01 | Access |
| 49 | <i>erythromycin</i>                | J01FA01 | 15.00   | <0.01% | <0.01 | Watch  |
| 50 | <i>piperacillin</i>                | J01CA12 | 14.43   | <0.01% | <0.01 | Watch  |
| 51 | <i>ampicillin+sulbactam</i>        | J01CR01 | 10.51   | <0.01% | <0.01 | Access |
| 52 | <i>metronidazole</i>               | J01XD01 | 4.00    | <0.01% | <0.01 | Access |
| 53 | <i>cefoxitin</i>                   | J01DC01 | 2.50    | <0.01% | <0.01 | Watch  |

### (c) Females

| Rank | Antibiotic name                     | ATC<br>5 <sup>th</sup> level | DDD       |        | DID  | AWaRe<br>Class |
|------|-------------------------------------|------------------------------|-----------|--------|------|----------------|
|      |                                     |                              | N         | %      |      |                |
| 1    | <i>amoxicillin+clavulanic acid</i>  | J01CR02                      | 607175.99 | 30.24% | 4.88 | Access         |
| 2    | <i>levofloxacin</i>                 | J01MA12                      | 285625.00 | 14.22% | 2.3  | Watch          |
| 3    | <i>clarithromycin</i>               | J01FA09                      | 200494.00 | 9.98%  | 1.61 | Watch          |
| 4    | <i>azithromycin</i>                 | J01FA10                      | 181193.00 | 9.02%  | 1.46 | Watch          |
| 5    | <i>ciprofloxacin</i>                | J01MA02                      | 142540.00 | 7.10%  | 1.15 | Watch          |
| 6    | <i>amoxicillin</i>                  | J01CA04                      | 135937.61 | 6.77%  | 1.09 | Access         |
| 7    | <i>cefixime</i>                     | J01DD08                      | 132065.00 | 6.58%  | 1.06 | Watch          |
| 8    | <i>fosfomycin</i>                   | J01XX01                      | 101353.33 | 5.05%  | 0.81 | Watch          |
| 9    | <i>ceftriaxone</i>                  | J01DD04                      | 35185.50  | 1.75%  | 0.28 | Watch          |
| 10   | <i>cefditoren</i>                   | J01DD16                      | 30380.00  | 1.51%  | 0.24 | Watch          |
| 11   | <i>trimetoprim+sulfamethoxazole</i> | J01EE01                      | 29479.00  | 1.47%  | 0.24 | Access         |
| 12   | <i>doxycycline</i>                  | J01AA02                      | 19280.00  | 0.96%  | 0.15 | Access         |

|    |                                    |         |          |        |       |        |
|----|------------------------------------|---------|----------|--------|-------|--------|
| 13 | <i>prulifloxacin</i>               | J01MA17 | 18680.00 | 0.93%  | 0.15  | Watch  |
| 14 | <i>norfloxacin</i>                 | J01MA06 | 13811.00 | 0.69%  | 0.11  | Watch  |
| 15 | <i>ceftibuten</i>                  | J01DD14 | 13393.80 | 0.67%  | 0.11  | Watch  |
| 16 | <i>cefalexina</i>                  | J01DB01 | 10600.50 | 0.53%  | 0.09  | Access |
| 17 | <i>cefpodoxime</i>                 | J01DD13 | 9004.00  | 0.45%  | 0.07  | Watch  |
| 18 | <i>cefuroxima</i>                  | J01DC02 | 8928.00  | 0.44%  | 0.07  | Watch  |
| 19 | <i>spiramycin</i>                  | J01FA02 | 4664.00  | 0.23%  | 0.04  | Watch  |
| 20 | <i>moxifloxacin</i>                | J01MA14 | 3885.00  | 0.19%  | 0.03  | Watch  |
| 21 | <i>roxithromycin</i>               | J01FA06 | 3798.00  | 0.19%  | 0.03  | Watch  |
| 22 | <i>minocycline</i>                 | J01AA08 | 2508.00  | 0.12%  | 0.02  | Watch  |
| 23 | <i>pipemidic acid</i>              | J01MB04 | 2480.00  | 0.12%  | 0.02  | Watch  |
| 24 | <i>lomefloxacin</i>                | J01MA07 | 2410.00  | 0.12%  | 0.02  | Watch  |
| 25 | <i>bacampicillin</i>               | J01CA06 | 2364.00  | 0.12%  | 0.02  | Access |
| 26 | <i>cefaclor</i>                    | J01DC04 | 1882.00  | 0.09%  | 0.02  | Watch  |
| 27 | <i>miocamycin</i>                  | J01FA11 | 1260.00  | 0.06%  | 0.01  | Watch  |
| 28 | <i>amikacin</i>                    | J01GB06 | 1043.50  | 0.05%  | 0.01  | Access |
| 29 | <i>ceftazidime</i>                 | J01DD02 | 998.13   | 0.05%  | 0.01  | Watch  |
| 30 | <i>lymecycline</i>                 | J01AA04 | 910.00   | 0.05%  | 0.01  | Watch  |
| 31 | <i>cefodizime</i>                  | J01DD09 | 647.50   | 0.03%  | 0.01  | Watch  |
| 32 | <i>cefepime</i>                    | J01DE01 | 534.75   | 0.03%  | <0.01 | Watch  |
| 33 | <i>cefotaxime</i>                  | J01DD01 | 500.50   | 0.02%  | <0.01 | Watch  |
| 34 | <i>clindamycin</i>                 | J01FF01 | 459.00   | 0.02%  | <0.01 | Access |
| 35 | <i>piperacillin+tazobactam</i>     | J01CR05 | 442.00   | 0.02%  | <0.01 | Watch  |
| 36 | <i>pefloxacin</i>                  | J01MA03 | 405.00   | 0.02%  | <0.01 | Watch  |
| 37 | <i>flucloxacillin</i>              | J01CF05 | 360.00   | 0.02%  | <0.01 | Access |
| 38 | <i>lincomycin</i>                  | J01FF02 | 349.33   | 0.02%  | <0.01 | Watch  |
| 39 | <i>teicoplanin</i>                 | J01XA02 | 289.00   | 0.01%  | <0.01 | Watch  |
| 40 | <i>cefprozil</i>                   | J01DC10 | 204.00   | 0.01%  | <0.01 | Watch  |
| 41 | <i>tobramycin</i>                  | J01GB01 | 140.00   | 0.01%  | <0.01 | Watch  |
| 42 | <i>josamycin</i>                   | J01FA07 | 99.00    | <0.01% | <0.01 | Watch  |
| 43 | <i>netilmicin</i>                  | J01GB07 | 91.86    | <0.01% | <0.01 | Watch  |
| 44 | <i>cefazolin</i>                   | J01DB04 | 62.33    | <0.01% | <0.01 | Access |
| 45 | <i>piperacillin</i>                | J01CA12 | 38.57    | <0.01% | <0.01 | Watch  |
| 46 | <i>erythromycin</i>                | J01FA01 | 27.00    | <0.01% | <0.01 | Watch  |
| 47 | <i>telithromycin</i>               | J01FA15 | 15.00    | <0.01% | <0.01 | Watch  |
| 48 | <i>metronidazole</i>               | J01XD01 | 15.00    | <0.01% | <0.01 | Access |
| 49 | <i>benzathine benzylpenicillin</i> | J01CE08 | 13.50    | <0.01% | <0.01 | Access |
| 50 | <i>rufloxacin</i>                  | J01MA10 | 12.00    | <0.01% | <0.01 | Watch  |
| 51 | <i>ampicillin+sulbactam</i>        | J01CR01 | 6.66     | <0.01% | <0.01 | Access |
| 52 | <i>cefoxitin</i>                   | J01DC01 | 1.00     | <0.01% | <0.01 | Watch  |
| 53 | <i>oxacillin</i>                   | J01CF04 | 0.00     | 0.00%  | 0.00  | Access |
